# Supplementary material for: Synthesis of fluorescent carbon nanoparticles from polyacrylamide for fast cellular endocytosis
Source: Royal Society of Chemistry journal article supplement (doi:10.1039/c3ra41654b), 2013-01-01
Supplement: c3ra41654b.pdf [file c3ra41654b.pdf]

## Electronic Supplementary Information

### **Synthesis of Fluorescent Carbon Nanoparticles from Polyacrylamide for Fast Cellular Endocytosis**

**Jiangjiang Gu,<sup>a</sup> Weina Wang,<sup>a</sup> Qihong Zhang,<sup>a</sup> Zhen Meng,<sup>a</sup> Xudong Jia<sup>\*a</sup>  
and Kai Xi<sup>\*b</sup>**

<sup>a</sup> State Key Laboratory of Coordination Chemistry, Department of Polymer Science & Engineering, Nanjing National Laboratory of Microstructures, Nanjing University, Nanjing 210093, P.R. China.

<sup>b</sup> Department of Polymer Science & Engineering, Nanjing University, Nanjing 210093, P.R. China.

## Experimental Details

### 1. Chemicals:

Polyacrylamide solution (average  $M_w=10000$ , 50wt% in  $H_2O$ ) was purchased from Aldrich. All aqueous solutions were prepared with deionized water ( $18\text{ M}\Omega\cdot\text{cm}^{-1}$ ) obtained from the Millipore system.

### 2. Preparation and purification of the fluorescent carbon nanoparticles (CNPs):

In a typical experiment, 8g polyacrylamide solution was diluted with 40mL deionized water and stirred for 10 minutes to become homogeneous and clear. Then the mixture was transferred to a 100 mL Teflon equipped stainless steel autoclave and sealed. The autoclave was placed in a oven at  $260\text{ }^\circ\text{C}$  for given hours to complete the hydrothermal treatment with heating rate at  $5\text{ }^\circ\text{C}\cdot\text{min}^{-1}$ . When the reaction was completed, the autoclave is cooled down at room temperature. The obtained brown solution without any deposit was neutralized and dialyzed for 3 days (MWCO =3.5 kD for 24h-CNPs and 96h-CNPs, MWCO =7 kD for 72h-CNPs ) to precipitate out small molecules. In addition, the remaining 72h-CNPs solution was processed with ultrasonic disruptor to disintegrate particle aggregates. Finally, the yellow solution was freeze dried to obtain the pure fluorescent CNPs.

### 3. Characterization:

Transmission electron microscopy (TEM) images were taken by a JEM-1011 electron microscope (JEOL, Japan) at an accelerating voltage of 100 kV. Dynamic light scattering (DLS) result was obtained by a Malvern MasterSizer 2000. The X-ray diffraction (XRD) patterns were measured by a D8 Advance X-ray diffractometer (Bruker) with Cu Ka radiation (40 kV, 40 mA,  $\lambda =1.54051\text{ \AA}$ ). Fourier transform infrared (FTIR) spectroscopy were performed on an Vector-22 spectrometer (Bruker) in the KBr pellet, ranging from  $400\text{ to }4000\text{ cm}^{-1}$ . Zeta potential measurements were obtained on a Malvern Nano-Z instrument. Elemental analysis was measured with a CHN-O-Rapid elemental analyzer (Heraeus, Germany). Ultraviolet-visible (UV-vis) absorption of the obtained CNPs solution was carried on a UV-1800(PC) UV-vis

spectrophotometer (Mapada, China). All fluorescence spectra of the CNPs were measured with a FluoroMax-4 spectrofluorometer (HORIBA Scientific, Japan) with slit width of 5 nm for both excitation and emission. The fluorescence images were acquired with a Leica TCS SP5 confocal scanning microscope (Leica Microsystems, Heidelberg GmbH, Mannheim, Germany). The specimens were excited at 488 nm, and the emission was detected between 500 and 530 nm.

#### 4. Quantum yield (QY) measurements:

The quantum yield (QY) of fluorescent CNPs was obtained by the following steps. We chose quinine sulfate dissolved in 0.1 M H<sub>2</sub>SO<sub>4</sub> (literature quantum yield 0.54 at 360 nm) as reference. Then UV-vis absorption and PL emission spectra (with 360nm excitation) of CNPs and reference were measured respectively. The accurate QY value was calculated according to the given equation:

$$Q_{sam} = Q_{ref} \frac{I_{sam} A_{ref} n_{sam}^2}{I_{ref} A_{sam} n_{ref}^2}$$

In here “*sem*” and “*ref*” refer to sample and reference respectively. Q means Quantum yield. I is the integrated emission intensity, which could be calculated from the emission spectra at 360nm excitation. A represents UV-vis absorbancies at 360 nm were control under 0.1 in the 10 mm quartz absorbance cell to avoid re-absorption effect. And n is the refractive index with 1.33 as the default for both quinine sulfate and CNPs solvent.

**Table S1** Quantum yield (QY) calculation of the fluorescent CNPs at 360nm

| Sample          | Intergrated emission intensity (I) | UV Absorbance | Refractive index of solvent (n) | Quantum yield (Q) |
|-----------------|------------------------------------|---------------|---------------------------------|-------------------|
| Quinine sulfate | 30950715                           | 0.0067        | 1.33 (default)                  | 0.54              |
| 24h-CNPs        | 53281110                           | 0.0501        | 1.33 (default)                  | 0.124             |
| 72h-CNPs        | 64858990                           | 0.0597        | 1.33 (default)                  | 0.127             |
| 96h-CNPs        | 46717285                           | 0.0438        | 1.33 (default)                  | 0.125             |

## 5. Cytotoxicity test:

LnCaP cells ( $10^5$  cells/mL) in Dulbecco's modified Eagle's medium (DMEM) with high glucose were incubated in a 96-well microplate (100  $\mu$ L/well) for 6 h to adhere in an incubator at 37 °C in 5% CO<sub>2</sub>. Then 100  $\mu$ L of the CNPs solution with different concentration was introduced into per well to obtain the final concentration of 10, 50, 200, 400, 600, 800, 1000  $\mu$ g/mL and were cultured for 24 h. The medium was removed and the cells were washed with phosphate-buffered saline (PBS, pH 7.4). 100  $\mu$ L DMEM and 20  $\mu$ L of 5 mg/mL MTT solution were added to every cell well. The 96-well microplate was further incubated for 4 h, followed by removing the culture medium with MTT, and then 150  $\mu$ L of DMSO was added. The resulting mixture was shaken for 10 min at room temperature. The optical density (OD) of the mixture at 490 nm was measured in the En-Spire multimode plate reader. The PBS was introduced into the cells in the control group. The cell viability was calculated according to the given equation:

$$\text{Cell viability} = \frac{\text{OD}_{\text{sam}}}{\text{OD}_{\text{con}}} \times 100\%$$

In here OD<sub>con</sub> refers to OD of sample, and OD<sub>sam</sub> refers to OD of control group.

## 6. Cellular imaging experiments:

LnCaP cells were cultured in three confocal dishes with 1 mL DMEM with high glucose at 37 °C in 5% CO<sub>2</sub> for 24 h. 0.25 mL CNPs aqueous solution (3 mg•mL<sup>-1</sup>) was added into the medium and the final concentration of CNPs were 0.6 mg•mL<sup>-1</sup>. The cells were cultured with CNPs at 37 °C for 1 or 2 h. The cells were washed with the physiological extracellular buffer (ECB: 135 mM NaCl, 5 mM KCl, 1 mM MgCl<sub>2</sub>, 1 mM CaCl<sub>2</sub>, 10 mM HEPES, 10 mM glucose, pH 7.4) for three times before the fluorescent imaging. The fluorescent intensity of the cells was analyzed using the software Image J.

## 7. Explanation for using quality concentration to survey the nanoparticle's size dependent uptake:

The density of CNPs was difficult to measure, not like SiO<sub>2</sub> nanoparticles and gold nanoparticles. The CNPs were consisted of the core and polymer chains on the surface, but the ratio and density of these two parts were unknown and had not been calculated in related research yet. Additionally, as the CNPs grew, the influence of increased ratio of core on the density of CNPs was unclear. There was not an efficient and direct way to detect the amount of CNPs in cells, but to observe the fluorescence.

Some previous reports have used the same quality concentration to survey the size-dependent uptake of NPs, for example mesoporous silica nanoparticles<sup>[1]</sup>, TiO<sub>2</sub> nanoparticles<sup>[2]</sup>, and silica particles<sup>[3]</sup>, Especially for silica particles, they used RITC to label SiO<sub>2</sub> and evaluated the uptake amount by the average fluorescence intensity of RITC- SiO<sub>2</sub> per cell, which was similar to our study. The fluorescence intensity of CNPs was not as high as RITC, so it's hard for us to measure the average fluorescence intensity per cell by using their method. In view of the differences of the CNPs solution at 0.6 mg/mL, we normalized the average green brightness of each pixel of cells with the fluorescent intensities of CNPs in the solution to compare the uptake amount of CNPs.

### References:

1. F. Lu, S.H Wu, Y. Hung and C.Y Mou, *Small*, 2009, **5**: 1408–1413.
2. K.Y. Cai , Y.H Hou , Y. Hu , L. Zhao , Z. Luo , Y.S. Shi , M. Lai , W.H. Yang , and P. Liu, *Small*, 2011, **7**: 3026–3031.
3. Y.Y. Zhang, L. Hu, D.H Yu and C.Y Gao, *Biomaterials*, 2010, **31**: 8465-8474.

**Table S2** Elemental analysis results of the CNPs and polyacrylamide

| Sample         | C(%)  | H(%) | N(%)  | O(%,calculated) |
|----------------|-------|------|-------|-----------------|
| Polyacrylamide | 43.31 | 7.04 | 16.75 | 32.90           |
| 24h-CNPs       | 57.28 | 7.30 | 8.68  | 26.82           |
| 72h-CNPs       | 63.66 | 6.94 | 6.90  | 22.50           |
| 96h-CNPs       | 65.85 | 7.12 | 6.72  | 20.31           |

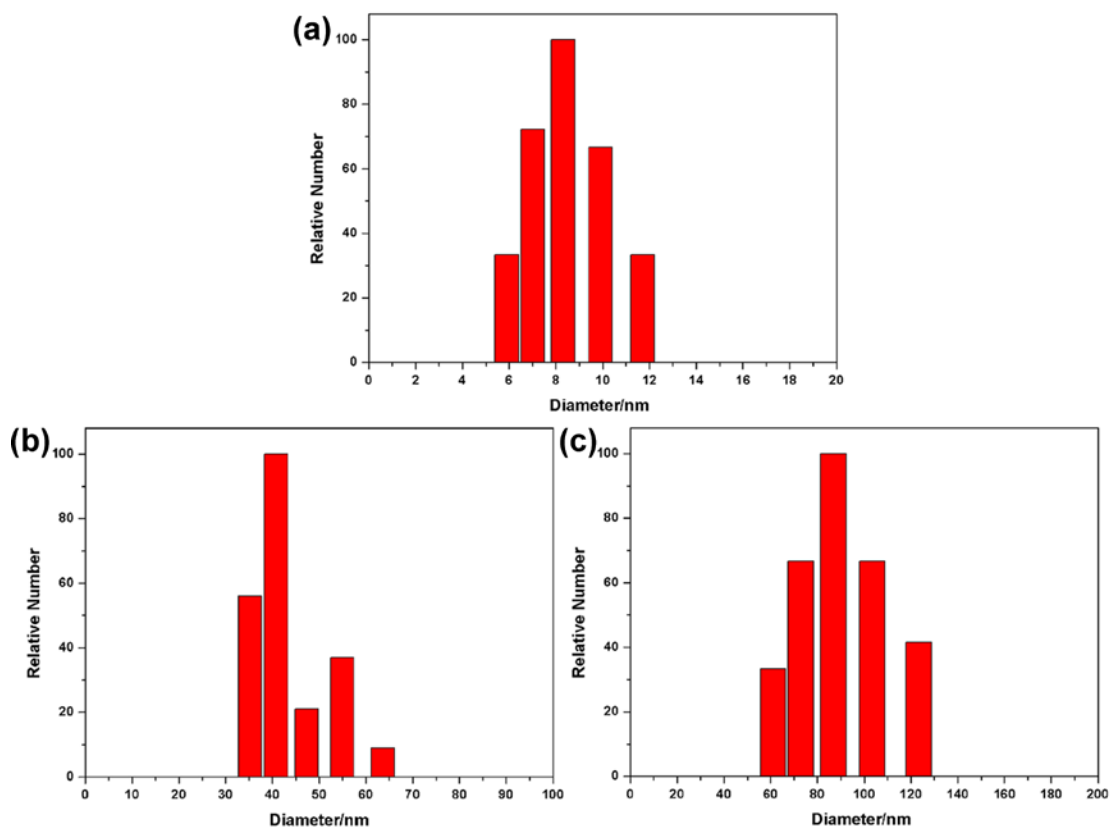

**Fig. S1** Particle size distribution histograms of CNPs obtained by DLS. (a): 24h-CNPs, (b): 72h-CNPs, (c): 96h-CNPs.

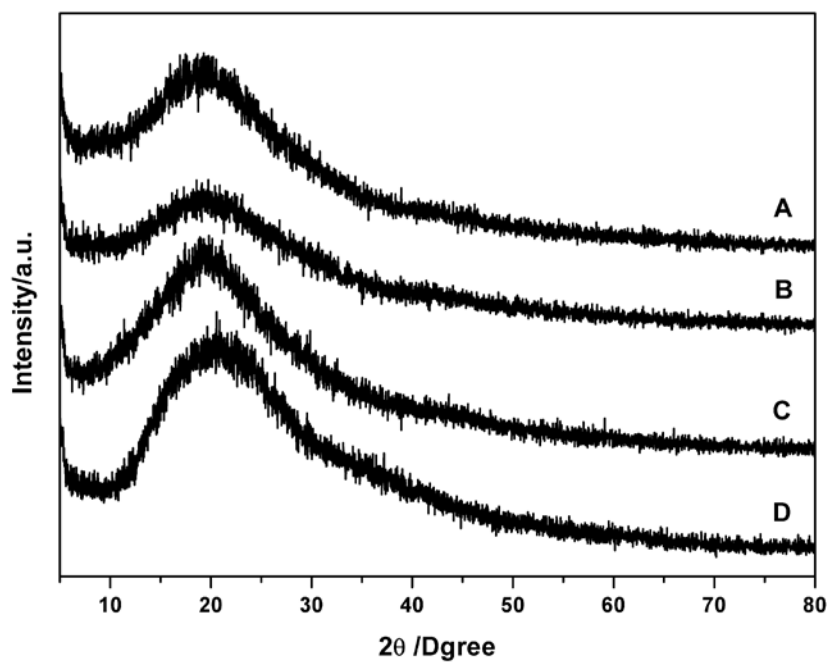

**Fig. S2** XRD patterns of the CNPs and polyacrylamide. (A): 96h-CNPs, (B):

72h-CNPs, (C): 24h-CNPs, (D): polyacrylamide.

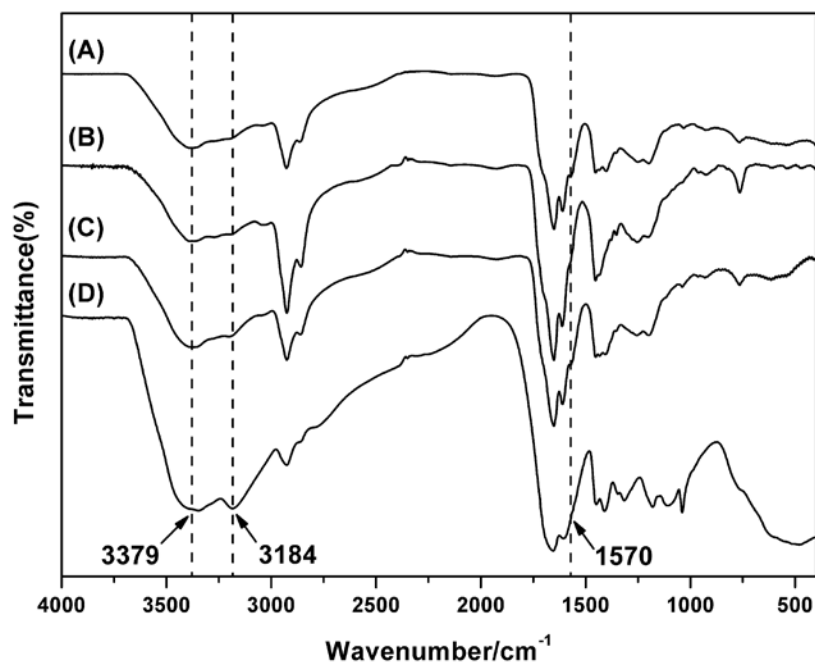

**Fig. S3** FTIR spectra and of the CNPs and polyacrylamide. (A): 96h-CNPs, (B): 72h-CNPs, (C): 24h-CNPs, (D): polyacrylamide.

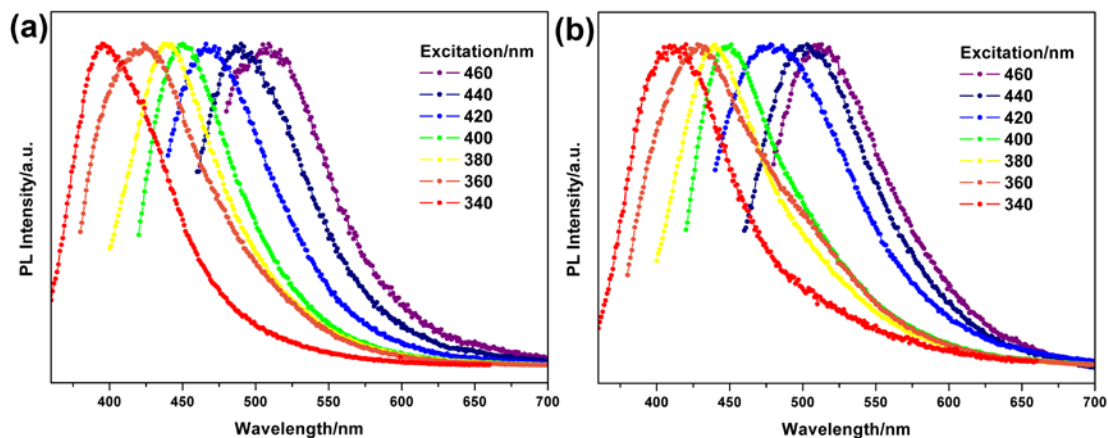

**Fig. S4** Normalized photoluminescence emission spectra of 24h-CNPs (a) and 96h-CNPs (b). Excitation wavelengths start from 340 nm and increase with 20 nm increments.

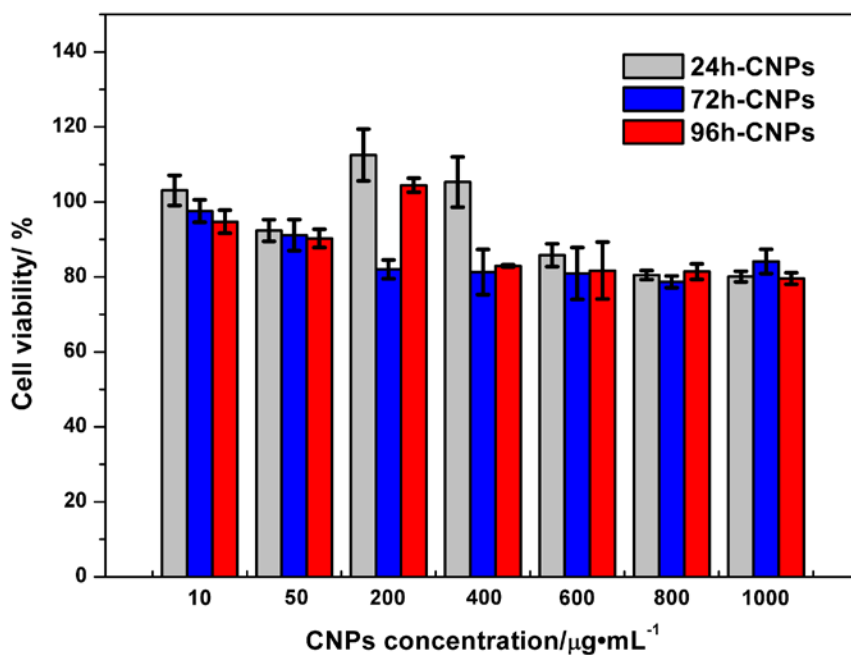

**Fig. S5** Cytotoxicity test of LnCaP cells with different concentration of 24h-CNPs, 72h-CNPs and 96h-CNPs after 24 h incubation. The error bars corresponded to standard errors ( $n \geq 3$ ).

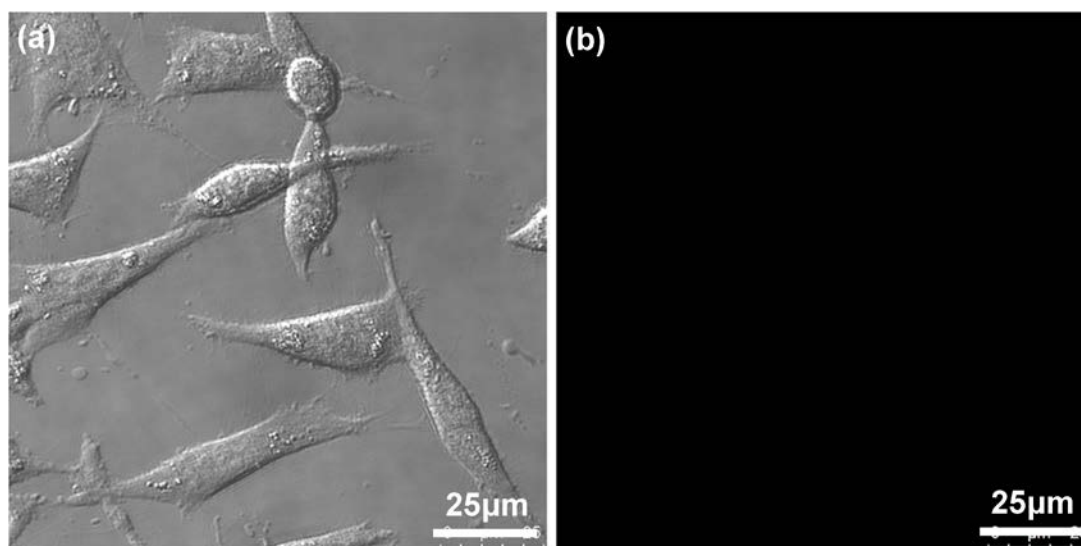

**Fig. S6** Confocal scanning microscope microphotographs of LnCaP cells labeled with the CNPs driven from orange juice (QY=26%) for 1 h ( $\lambda_{\text{ex}}=488$  nm). (a): brightfield, (b): fluorescence.



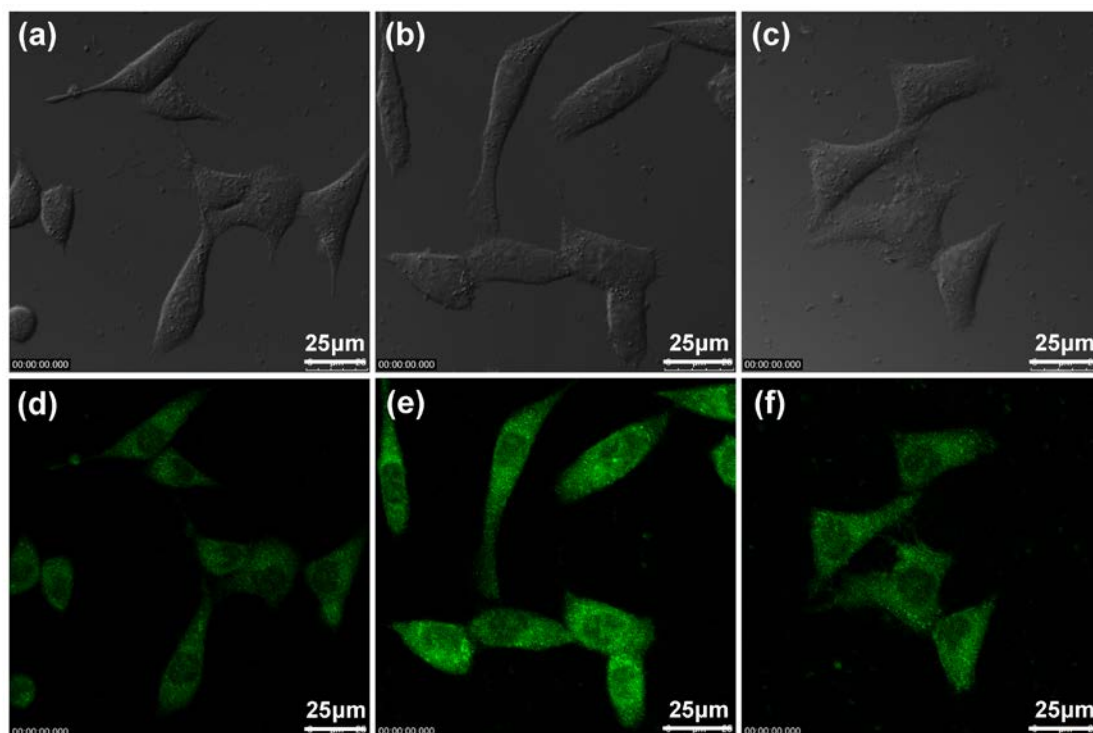

**Fig. S7** Brightfield (a, b, c) and fluorescence (d, e, f,) microphotographs of LnCaP cells labeled with the CNPs for 2 hours loading ( $\lambda_{ex}= 488$  nm). (a)(d): 24h-CNPs, (b)(e): 72h-CNPs, (c)(f): 96h-CNPs. The concentration of CNPs was  $0.6 \text{ mg}\cdot\text{mL}^{-1}$ .

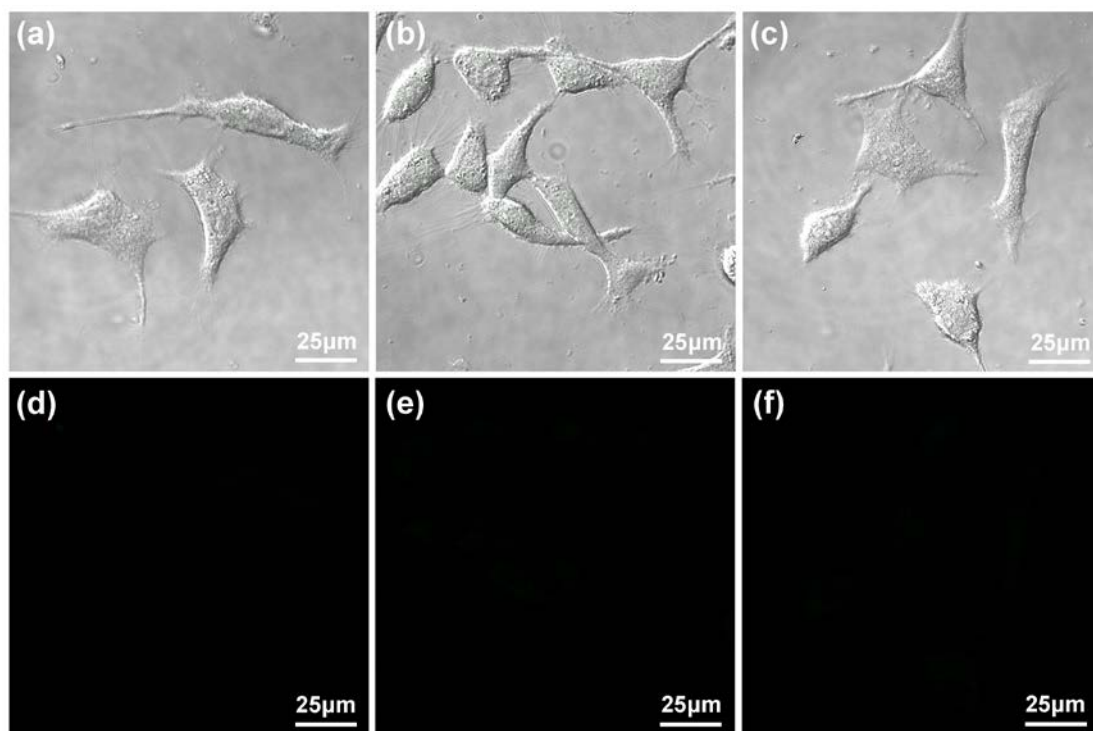

**Fig. S8** Brightfield (a, b, c) and fluorescence (d, e, f,) microphotographs of LnCaP cells cultured with the CNPs of  $0.6 \text{ mg}\cdot\text{mL}^{-1}$  for 1 h at  $4^{\circ}\text{C}$  ( $\lambda_{ex}= 488$  nm). (a)(d):

24h-CNPs, (b)(e): 72h-CNPs, (c)(f): 96h-CNPs.

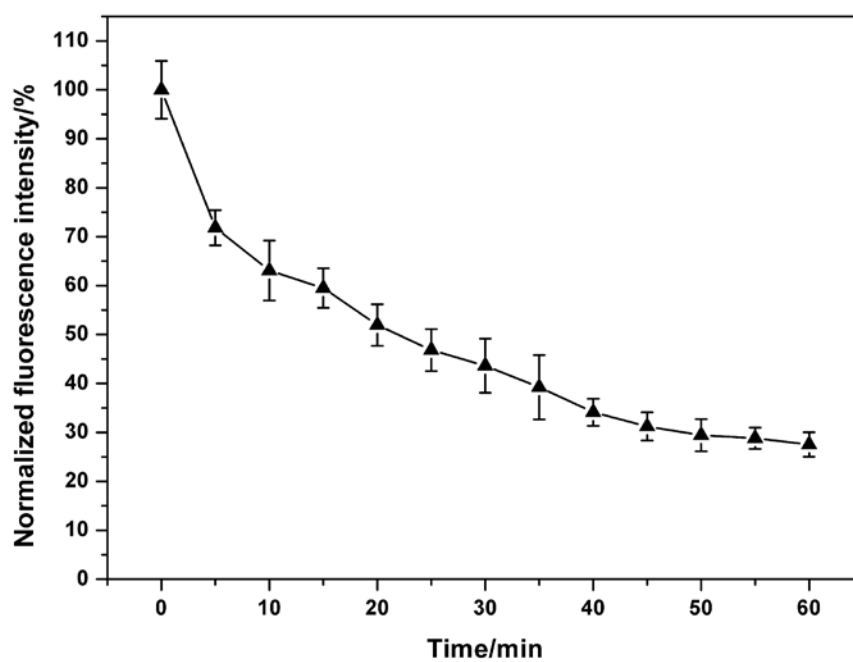

**Fig. S9** Normalized mean fluorescent intensity of five cells loaded with 72h-CNPs after continuous exposure of the laser light at 488nm. The fluorescence images of the cells were recorded every 5 min.

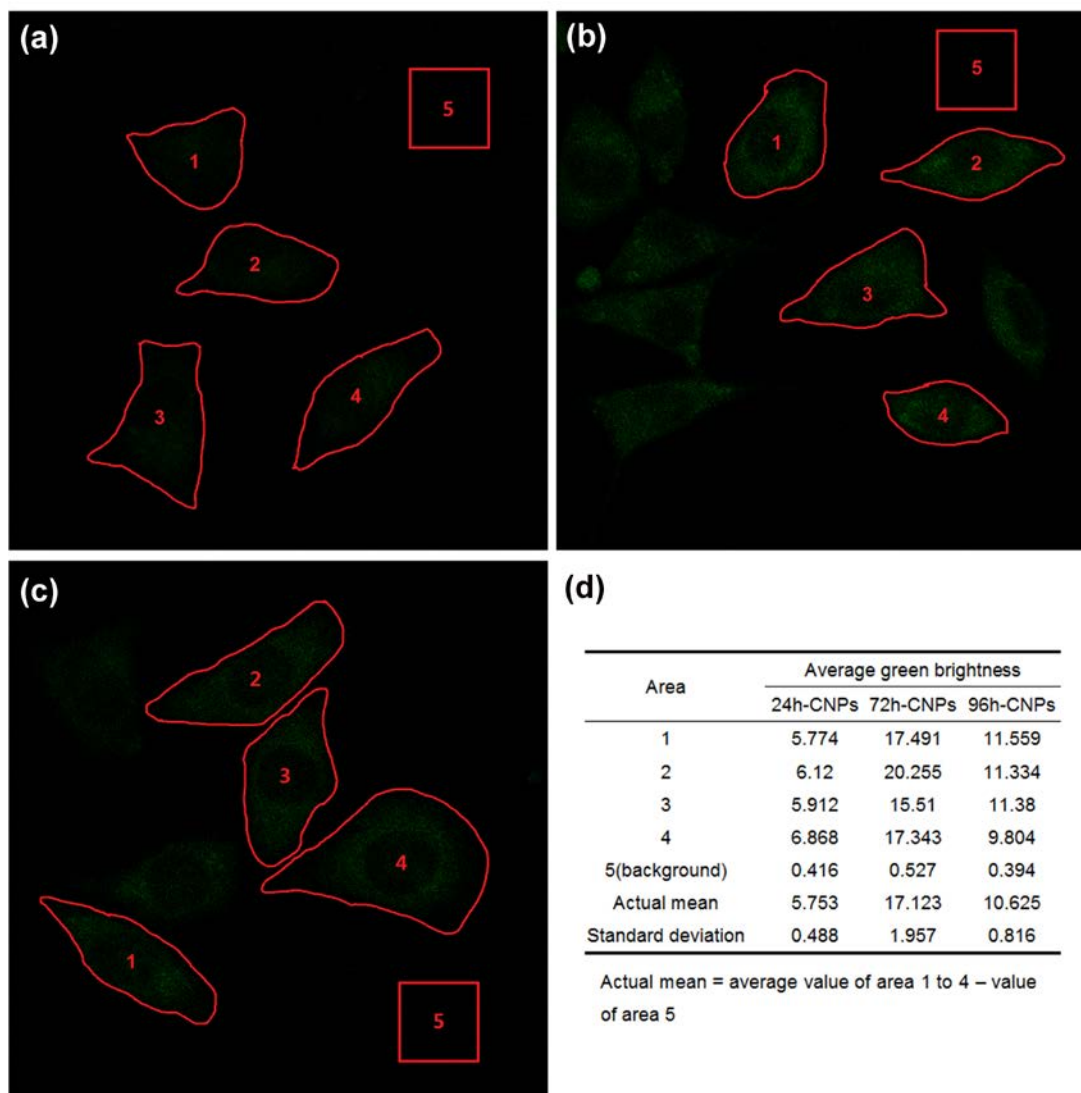

**Fig. S10** Comparison of actual average green brightness of each pixel in LnCaP cells in Fig. 3. Area mark of 24h-CNPs (a), 72h-CNPs (b) and 96h-CNPs (c). (d): Calculation of actual average green brightness of each pixel in LnCaP cells in Fig. 3.

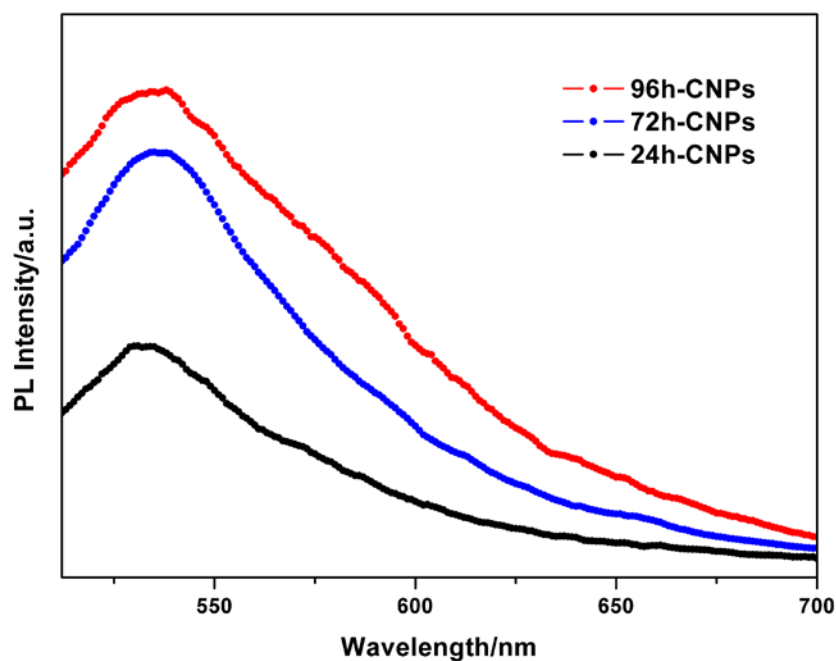

**Fig. S11** Emission spectra of 24h-CNPs, 72h-CNPs and 96h-CNPs at excitation wavelengths of 488 nm. (the concentration of CNPs was  $0.6 \text{ mg}\cdot\text{mL}^{-1}$ ).

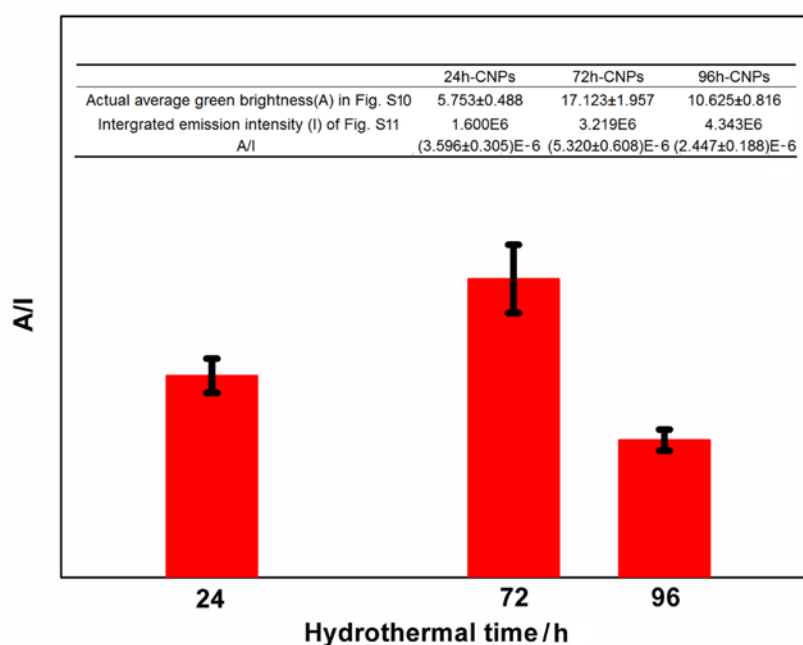

**Fig. S12** The change of A/I with increase of hydrothermal time. A: Actual average green brightness in Fig. S10, I: Integrated emission intensity of Fig. S11. The inset

table was calculation of A/I value.
